# Supplementary material for: Metal-bipyridine supported on 3-aminopropyl-functionalized MK10: effect of a metalating agent on the catalytic activity in the transesterification of β-keto ester
Source: Royal Society of Chemistry journal article supplement (doi:10.1039/d4ra04834b), 2024-01-01
Supplement: d4ra04834b1.pdf [file d4ra04834b1.pdf]

### Supplementary Information

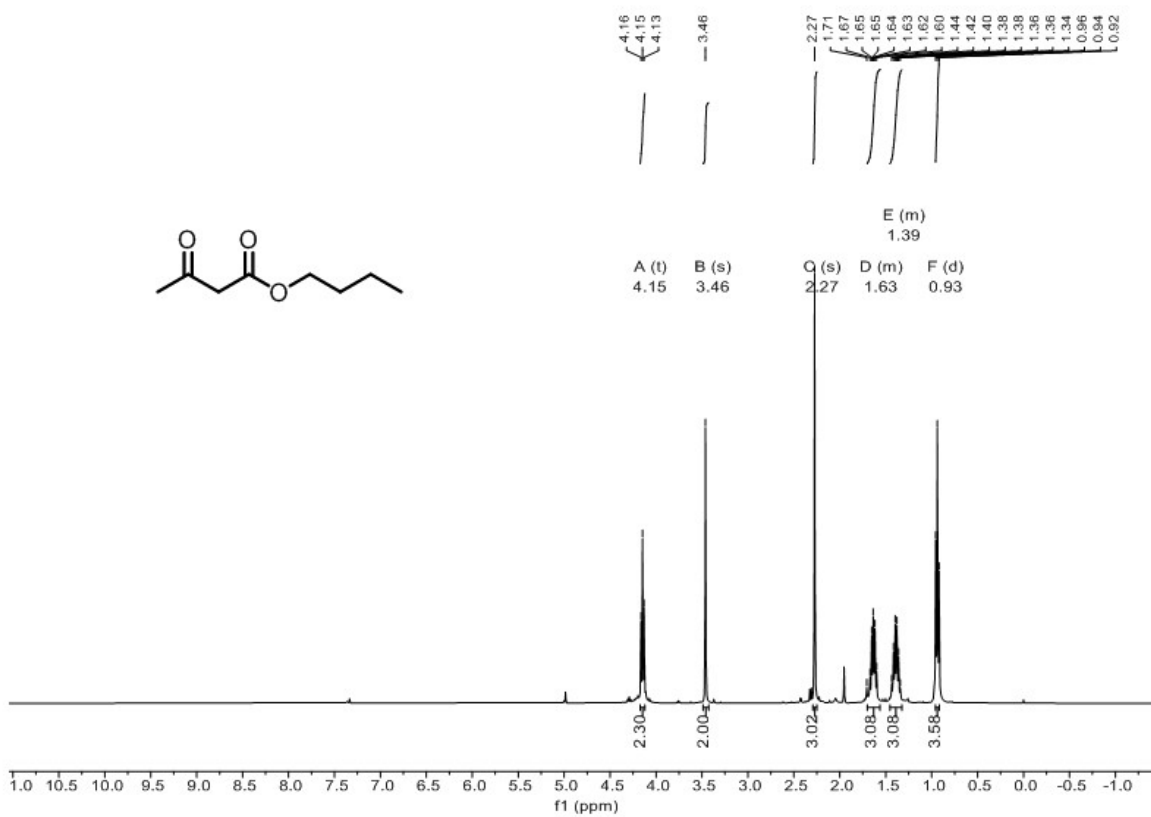

(a)

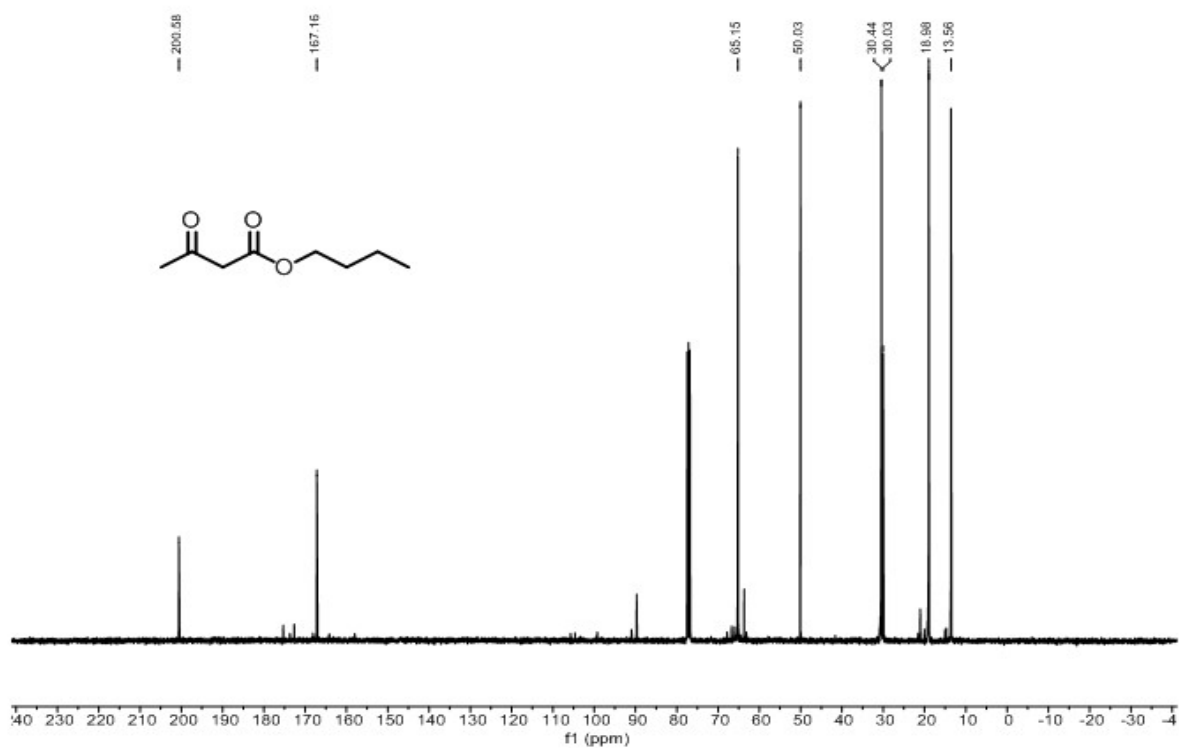

(b)

Fig. SM1: (a) <sup>1</sup>H NMR and (b) <sup>13</sup>C NMR spectra of butyl acetoacetate sample prepared under optimum conditions
